# Supplementary material for: Modification of a glassy carbon electrode with gold–platinum core–shell nanoparticles by electroless deposition and their electrocatalytic activity
Source: Royal Society of Chemistry journal article supplement (doi:10.1039/c5ra06537b), 2015-01-01
Supplement: c5ra06537b1.pdf [file c5ra06537b1.pdf]

## Supporting Information

### **Modification of Gold-Platinum Core-Shell Nanoparticles on Glassy Carbon Electrode by Electroless Deposition and Their Electrocatalytic Activity**

**N.S.K. Gowthaman and S. Abraham John\***

*Centre for Nanoscience and Nanotechnology*

*Department of Chemistry, Gandhigram Rural Institute*

*Gandhigram, Dindigul - 624 302, Tamilnadu, India*

*e-mail: [abrajohn@yahoo.co.in](mailto:abrajohn@yahoo.co.in)*

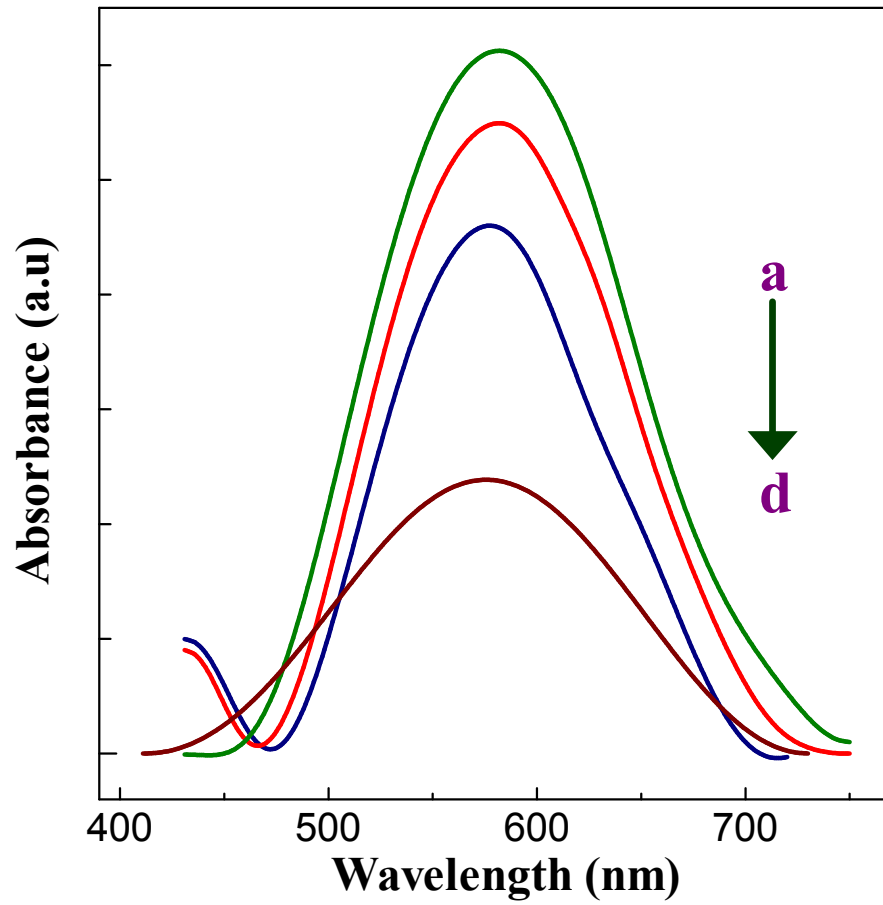

**Figure S1.** UV-vis absorption spectra obtained for (a) ITO/AuNPs (30 min), (b-d) ITO/Au-PtNPs at the immersion time of 45, 90 and 120 min.

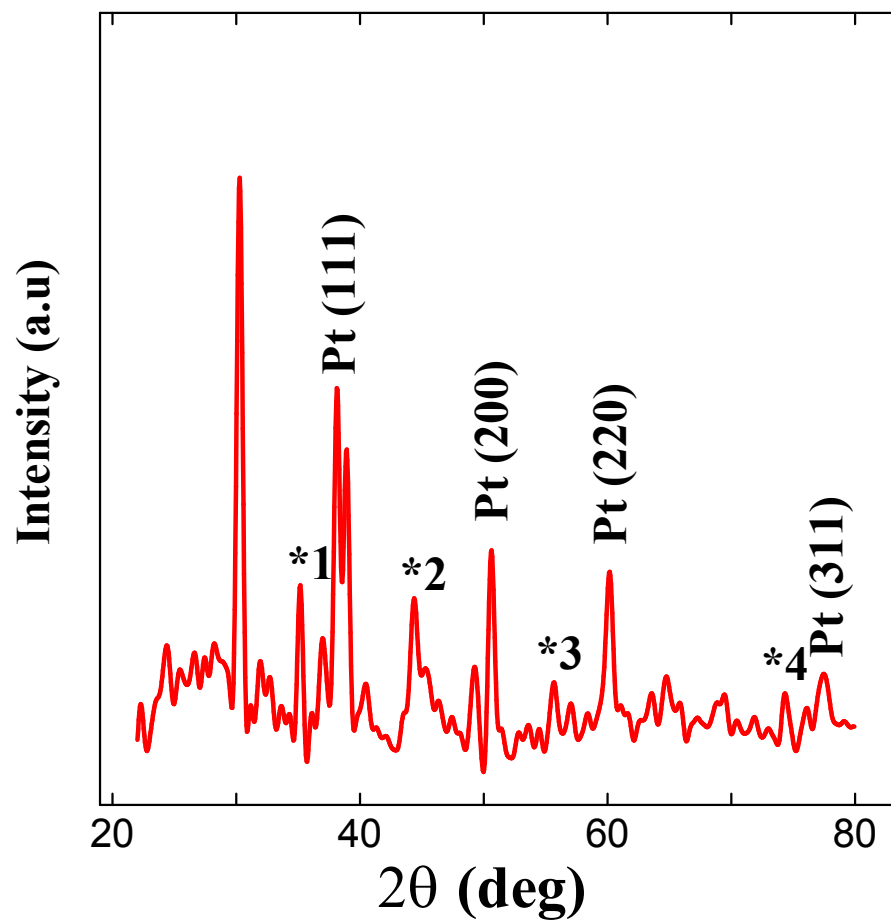

**Figure S2.** XRD pattern of Au@Pt NPs assemblies. \*1, \*2, \*3 and \*4 are the corresponding to Au planes.

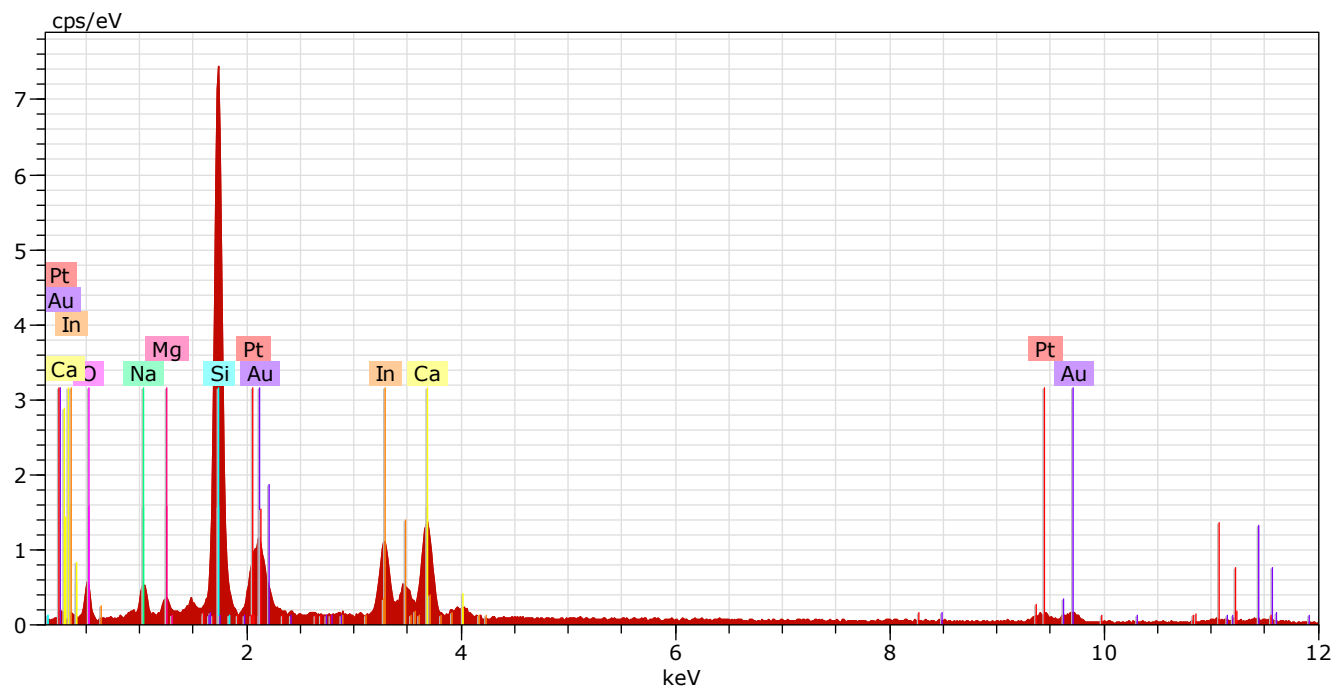

**Figure S3.** EDAX spectrum obtained for Au-PtNPs modified ITO substrate.

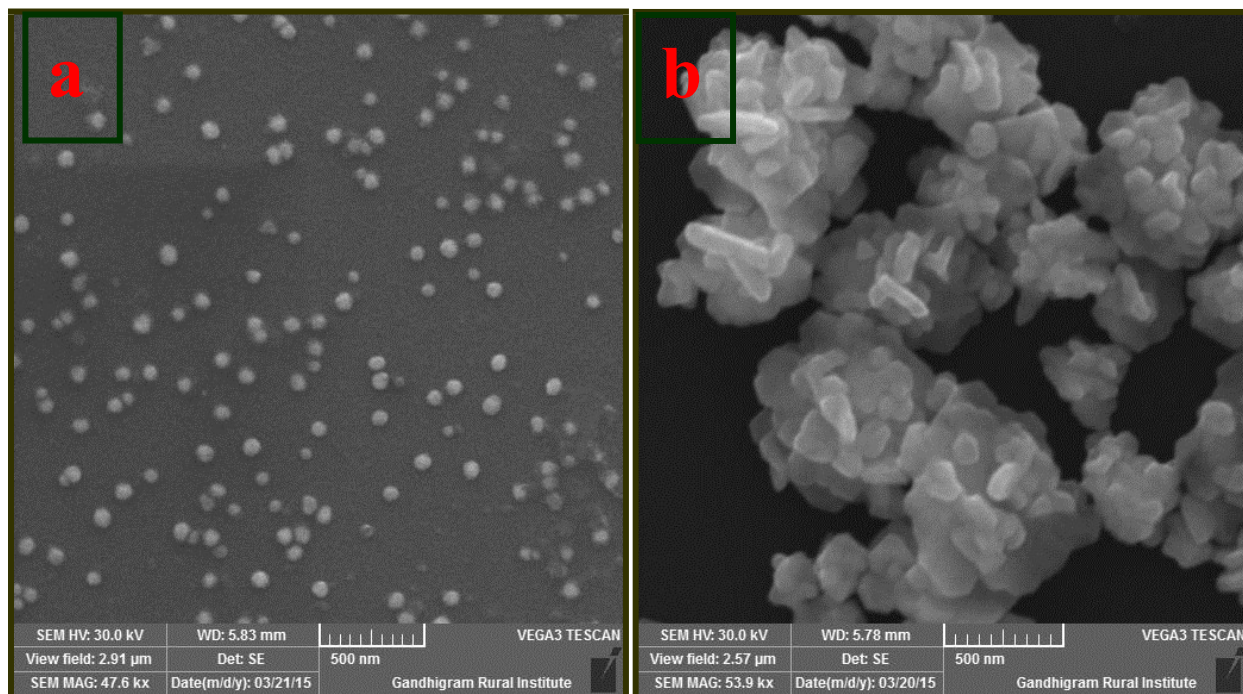

**Figure S4.** SEM images obtained for (a) GCE/AuNPs and GCE/AuNPs immersed into the solution containing  $\text{H}_2\text{PtCl}_6$  and  $\text{NH}_2\text{OH}$  for (b) 90 min.

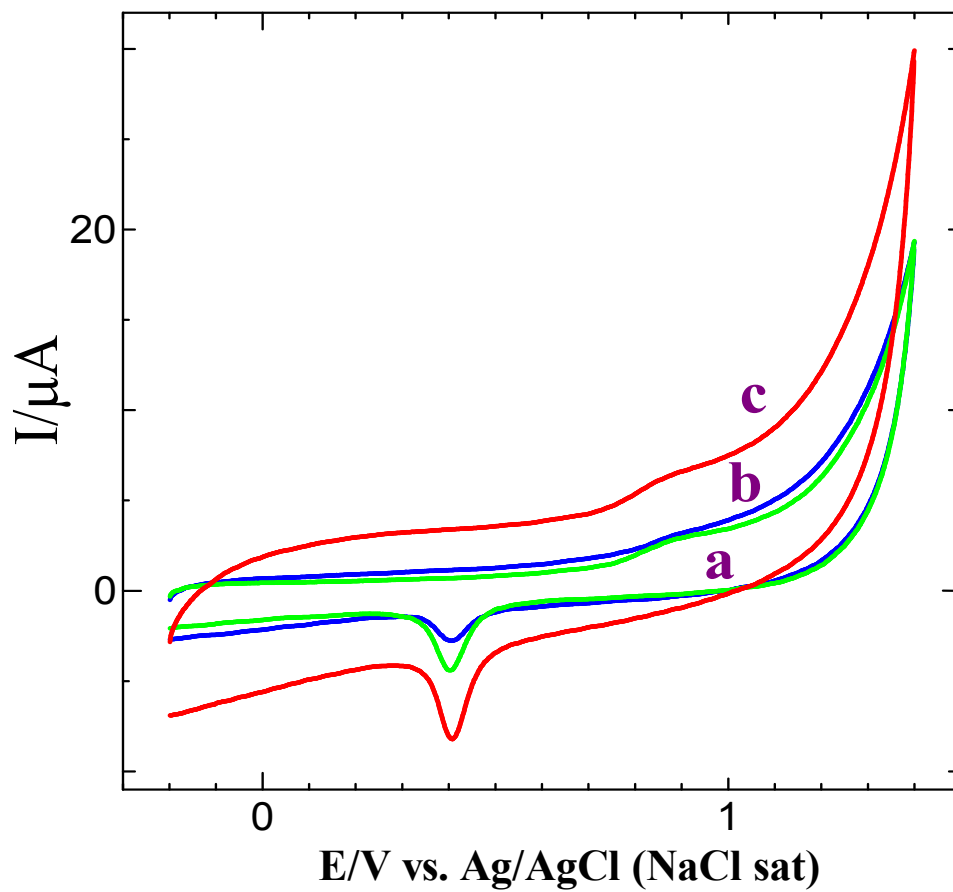

**Figure S5.** CVs obtained for GC/AuNPs electrode prepared with electroless deposition time of (a) 10 min, (b) 20 min and (c) 30 min in 0.2 M PB solution (pH 7.2) at a scan rate of  $50 \text{ mV s}^{-1}$ .

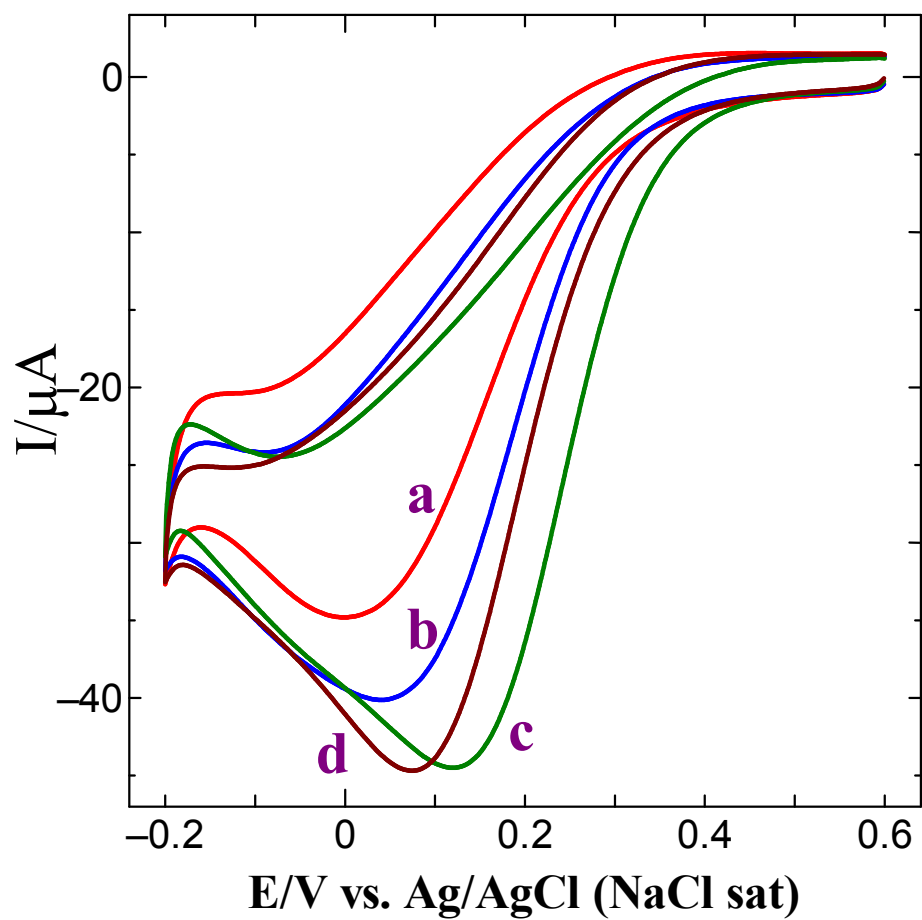

**Figure S6.** CVs obtained for dioxxygen reduction at GC/Au-PtNPs electrode at the deposition time of (a) 30, (b) 45, (c) 90 and (d) 120 min in oxygen saturated 0.5 M  $\text{H}_2\text{SO}_4$  at a scan rate of  $50 \text{ mV s}^{-1}$ .

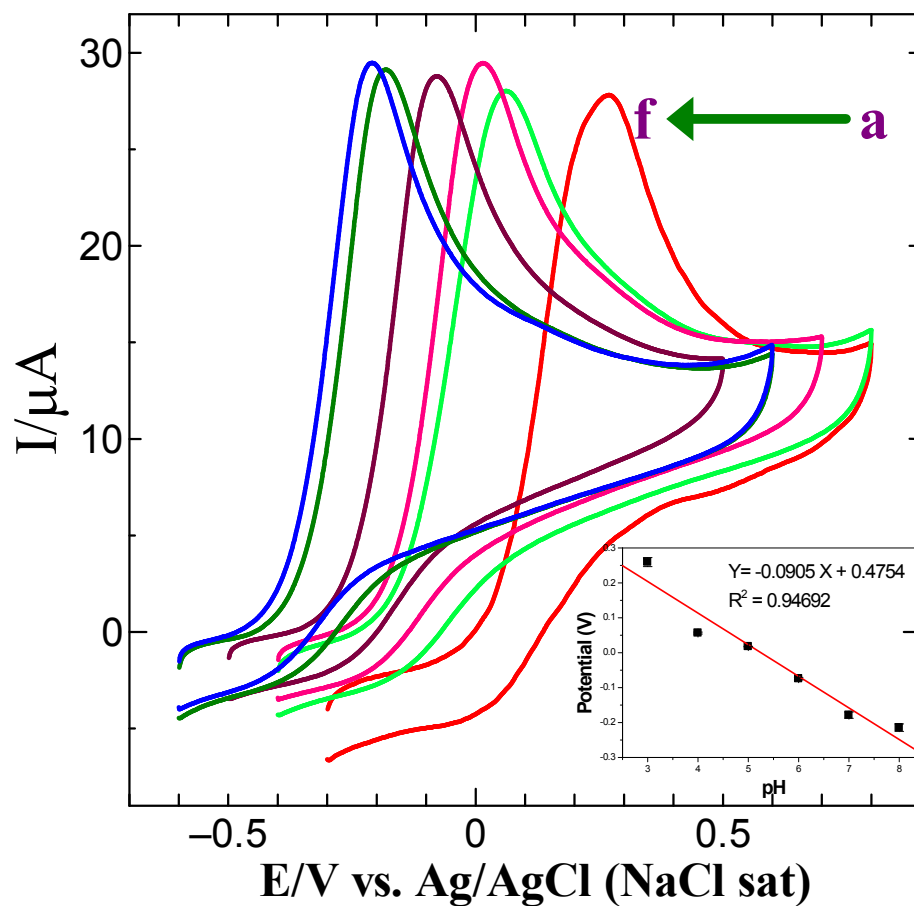

**Figure S7.** CVs obtained for 0.5 mM hydrazine at GCE/Au-PtNPs in 0.2 M PBS at pH (a) 3, (b) 4, (c) 5, (d) 6, (e) 7 and (f) 8 at a scan rate of  $50 \text{ mV s}^{-1}$ . Inset: The corresponding calibration plot obtained for potential vs. pH.



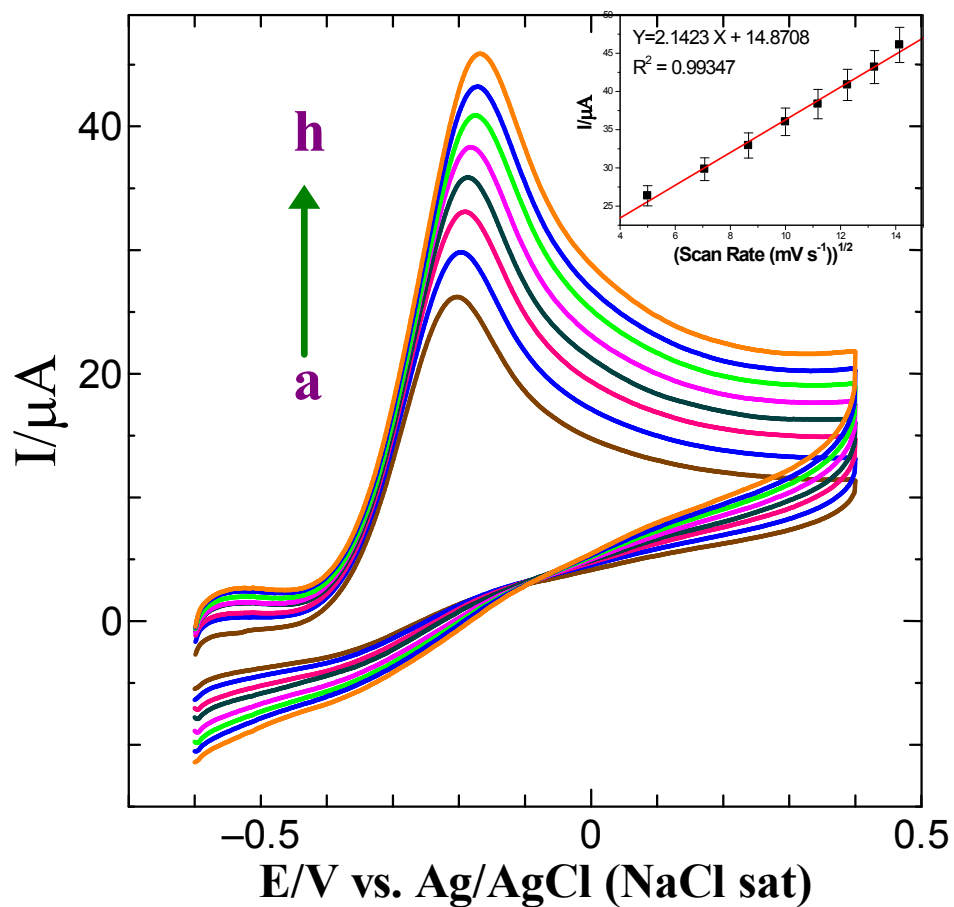

**Figure S8.** CVs obtained for 0.5 mM hydrazine at GCE/Au-PtNPs in 0.2 M PBS at pH 7.2 at different scan rates from 25 to 250  $\text{mV s}^{-1}$  (a-f). Inset: the corresponding calibration plot obtained for current vs. square root of scan rate.
